# Supplementary material for: Discovery of Novel Fetal Hemoglobin Inducers through Small Chemical Library Screening
Source: MDPI journal article supplement (doi:10.3390/ijms21197426), 2020-10-08
Supplement: s1 [file s1]

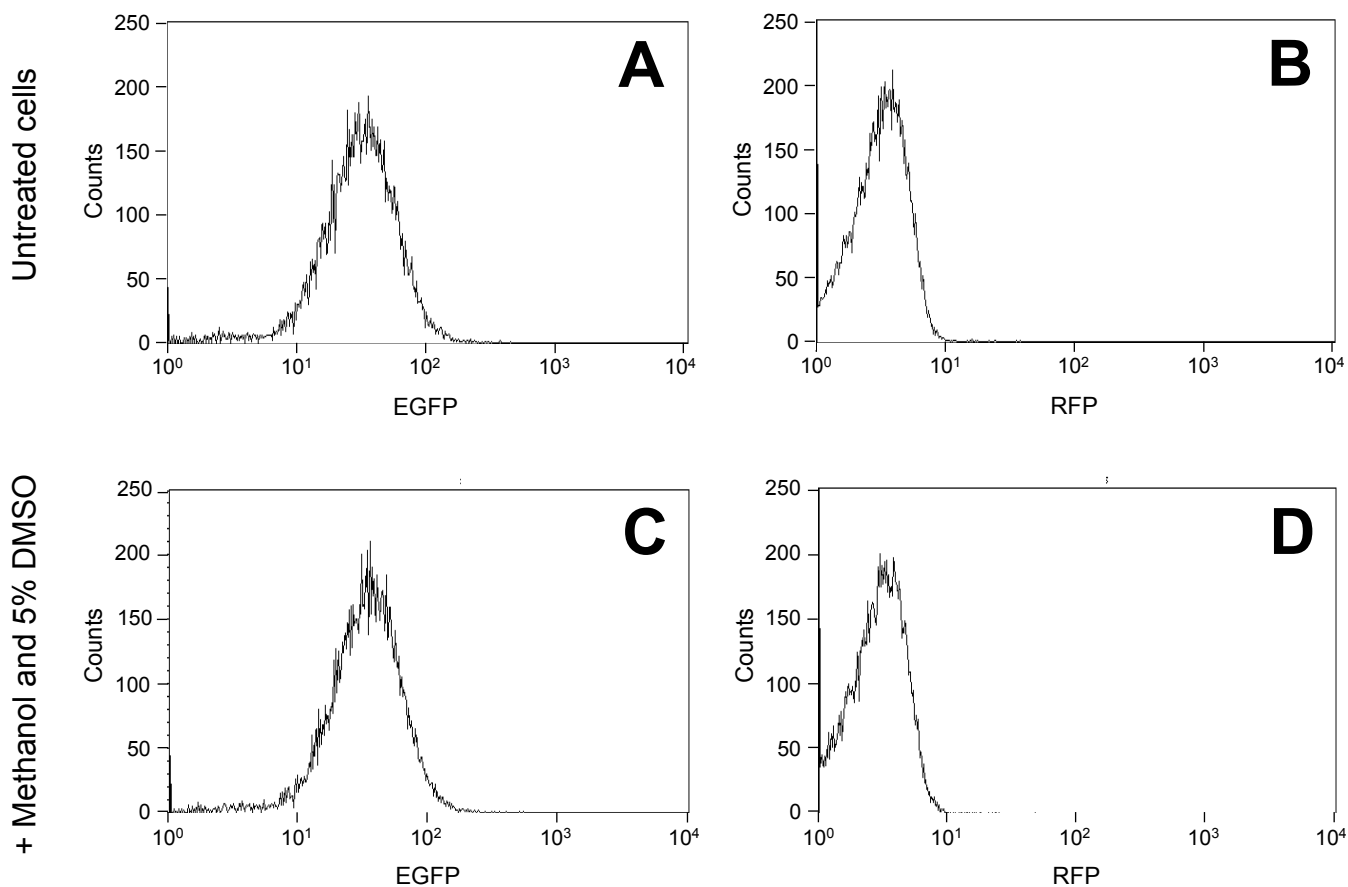

**Figure 1S.** Representative examples of FACS analysis of K562.GR cells, untreated (A, B) or treated with a methanol solution containing 5% DMSO (C, D). 30.000 cells were analyzed after five days of treatment, by detecting both EGFP (A, C) and RFP (B, D) fluorescence.
